# Supplementary material
Source: Springer Nature journal article supplement (https://www.springermedizin.de/resource/supplementary/12950_2012_342_MOESM5_ESM.pdf/9557506)

A

*p*-SMAD1/5/8

SMAD1

 $\beta$ -actin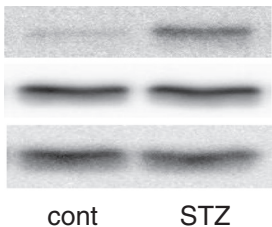

B

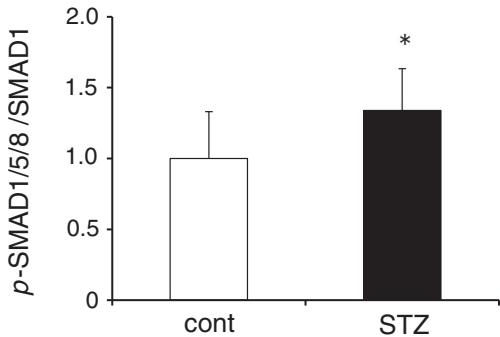

Supplement: MOESM5 [file 9557506]
